# Supplementary material for: Assessment of Potentially Preventable Hospital Readmissions After Major Surgery and Association With Public vs Private Health Insurance and Comorbidities
Source: PubMed Central journal article supplement (PMC8044735; doi:10.1001/jamanetworkopen.2021.5503), 2021-04-13
Supplement: jamanetwopen-e215503-s001.pdf [file jamanetwopen-e215503-s001.pdf]

## Supplementary Online Content

Brown CS, Montgomery JR, Neiman PU, et al. Assessment of potentially preventable hospital readmissions after major surgery and association with public vs private health insurance and comorbidities. *JAMA Netw Open*. 2021;4(4):e215503.  
doi:10.1001/jamanetworkopen.2021.5503

**eTable 1.** *ICD-10-PCS* Codes for Definition of Surgical Admissions

**eTable 2.** Top 15 Diagnosis Codes for 90-Day Readmissions

**eTable 3.** 90-Day Readmissions

**eTable 4.** Sensitivity Analysis—Multivariable Model—ACSC Only

**eTable 5.** Sensitivity Analysis—Multivariable Model—LOS  $\leq$  2 Days

This supplementary material has been provided by the authors to give readers additional information about their work.

**eTable 1. ICD-10-PCS Codes for Definition of Surgical Admissions**

**Coronary Artery Bypass Grafting**

|         |         |         |         |         |         |         |         |
|---------|---------|---------|---------|---------|---------|---------|---------|
| 0210083 | 0213083 | 02100J3 | 02100ZF | 02110J9 | 021209F | 02120KW | 02130J8 |
| 0210088 | 0213088 | 02100J3 | 02104A3 | 02110JC | 021209W | 02120Z3 | 02130J9 |
| 0210089 | 0213089 | 02100J8 | 02104J3 | 02110JF | 02120A3 | 02120Z8 | 02130JC |
| 0210093 | 0213093 | 02100J9 | 02104K3 | 02110JW | 02120A8 | 02120Z9 | 02130JF |
| 0210098 | 0213098 | 02100JC | 02104Z3 | 02110K3 | 02120A9 | 02120ZC | 02130JW |
| 0210099 | 0213099 | 02100JF | 021108C | 02110K8 | 02120AC | 02120ZF | 02130K3 |
| 0210493 | 021008C | 02100JW | 021108F | 02110K9 | 02120AF | 021308C | 02130K8 |
| 0211083 | 021008F | 02100K3 | 021108W | 02110KC | 02120AW | 021308F | 02130K9 |
| 0211088 | 021008W | 02100K3 | 021109C | 02110KF | 02120J3 | 021308W | 02130KC |
| 0211089 | 021009C | 02100K8 | 021109F | 02110KW | 02120J8 | 021309C | 02130KF |
| 0211093 | 021009F | 02100K9 | 021109W | 02110Z3 | 02120J9 | 021309F | 02130KW |
| 211098  | 021009W | 02100KC | 02110A3 | 02110Z8 | 02120JC | 021309W | 02130Z3 |
| 0211099 | 02100A3 | 02100KF | 02110A8 | 02110Z9 | 02120JF | 02130A3 | 02130Z8 |
| 0212083 | 02100A3 | 02100KW | 02110A9 | 02110ZC | 02120JW | 02130A8 | 02130Z9 |
| 0212088 | 02100A8 | 02100Z3 | 02110AC | 02110ZF | 02120K3 | 02130A9 | 02130ZC |
| 0212089 | 02100A9 | 02100Z3 | 02110AF | 021208C | 02120K8 | 02130AC | 02130ZF |
| 0212093 | 02100AC | 02100Z8 | 02110AW | 021208F | 02120K9 | 02130AF |         |
| 0212098 | 02100AF | 02100Z9 | 02110J3 | 021208W | 02120KC | 02130AW |         |
| 0212099 | 02100AW | 02100ZC | 0110J8  | 021209C | 02120KF | 02130J3 |         |

**Open Abdominal Aortic Aneurysm Repair**

|         |         |         |         |         |         |         |         |
|---------|---------|---------|---------|---------|---------|---------|---------|
| 04B00ZZ | 041009Q | 04100J8 | 04100KD | 04100ZJ | 041C0ZK | 041E09K | 041F0AK |
| 04R007Z | 041009R | 04100J9 | 04100KF | 04100ZK | 041D09H | 041E0AH | 041F0JH |
| 04R00JZ | 04100A6 | 04100JB | 04100KG | 04100ZQ | 041D09J | 041E0AJ | 041F0JJ |
| 04R00KZ | 04100A7 | 04100JC | 04100KH | 04100ZR | 041D09K | 041E0AK | 041F0JK |
| 04500ZZ | 04100A8 | 04100JD | 04100KJ | 041C09H | 041D0AH | 041E0JH | 041F0KH |
| 04B00ZZ | 04100A9 | 04100JF | 04100KK | 041C09J | 041D0AJ | 041E0JJ | 041F0KJ |
| 0410096 | 04100AB | 04100JG | 04100KQ | 041C09K | 041D0AK | 041E0JK | 041F0KK |
| 0410097 | 04100AC | 04100JH | 04100KR | 041C0AH | 041D0JH | 041E0KH | 041F0ZH |
| 0410098 | 04100AD | 04100JJ | 04100Z6 | 041C0AJ | 041D0JJ | 041E0KJ | 041F0ZJ |
| 0410099 | 04100AF | 04100JK | 04100Z7 | 041C0AK | 041D0JK | 041E0KK | 041F0ZK |
| 041009B | 04100AG | 04100JQ | 04100Z8 | 041C0JH | 041D0KH | 041E0ZH | 041H09H |
| 041009C | 04100AH | 04100JR | 04100Z9 | 041C0JJ | 041D0KJ | 041E0ZJ | 041H09J |
| 041009D | 04100AJ | 04100K6 | 04100ZB | 041C0JK | 041D0KK | 041E0ZK | 041H09K |
| 041009F | 04100AK | 04100K7 | 04100ZC | 041C0KH | 041D0ZH | 041F09H | 041H0AH |
| 041009G | 04100AQ | 04100K8 | 04100ZD | 041C0KJ | 041D0ZJ | 041F09J | 041H0AJ |
| 041009H | 04100AR | 04100K9 | 04100ZF | 041C0KK | 041D0ZK | 041F09K | 041H0AK |
| 041009J | 04100J6 | 04100KB | 04100ZG | 041C0ZH | 041E09H | 041F0AH | 041H0JH |
| 041009K | 04100J7 | 04100KC | 04100ZH | 041C0ZJ | 041E09J | 041F0AJ | 041H0JJ |

|         |         |         |         |         |         |         |         |
|---------|---------|---------|---------|---------|---------|---------|---------|
| 041H0JK | 041H0KK | 041H0ZK | 041J09K | 041J0AK | 041J0JK | 041J0KK | 041J0ZJ |
| 041H0KH | 041H0ZH | 041J09H | 041J0AH | 041J0JH | 041J0KH | 041J0ZH | 041J0ZK |
| 041H0KJ | 041H0ZJ | 041J09J | 041J0AJ | 041J0JJ | 041J0KJ |         |         |

### Lower Extremity Bypass

|         |         |         |         |         |         |         |
|---------|---------|---------|---------|---------|---------|---------|
| 041K09H | 041K0JK | 041K0ZM | 041L0AP | 041L0KS | 041M0JL | 041N0AL |
| 041K09J | 041K0JL | 041K0ZN | 041L0AQ | 041L0ZH | 041M0JM | 041N0AM |
| 041K09K | 041K0JM | 041K0ZP | 041L0AS | 041L0ZJ | 041M0JP | 041N0AP |
| 041K09L | 041K0JN | 041K0ZQ | 041L0JH | 041L0ZK | 041M0JQ | 041N0AQ |
| 041K09M | 041K0JP | 041K0ZS | 041L0JJ | 041L0ZL | 041M0JS | 041N0AS |
| 041K09N | 041K0JQ | 041L09H | 041L0JK | 041L0ZM | 041M0KL | 041N0JL |
| 041K09P | 041K0JS | 041L09J | 041L0JL | 041L0ZN | 041M0KM | 041N0JM |
| 041K09Q | 041K0KH | 041L09K | 041L0JM | 041L0ZP | 041M0KP | 041N0JP |
| 041K09S | 041K0KJ | 041L09L | 041L0JN | 041L0ZQ | 041M0KQ | 041N0JQ |
| 041K0AH | 041K0KK | 041L09M | 041L0JP | 041L0ZS | 041M0KS | 041N0JS |
| 041K0AJ | 041K0KL | 041L09N | 041L0JQ | 041M09L | 041M0ZL | 041N0KL |
| 041K0AK | 041K0KM | 041L09P | 041L0JS | 041M09M | 041M0ZM | 041N0KM |
| 041K0AL | 041K0KN | 041L09Q | 041L0KH | 041M09P | 041M0ZP | 041N0KP |
| 041K0AM | 041K0KP | 041L09S | 041L0KJ | 041M09Q | 041M0ZQ | 041N0KQ |
| 041K0AN | 041K0KQ | 041L0AH | 041L0KK | 041M09S | 041M0ZS | 041N0KS |
| 041K0AP | 041K0KS | 041L0AJ | 041L0KL | 041M0AL | 041N09L | 041N0ZL |
| 041K0AQ | 041K0ZH | 041L0AK | 041L0KM | 041M0AM | 041N09M | 041N0ZM |
| 041K0AS | 041K0ZJ | 041L0AL | 041L0KN | 041M0AP | 041N09P | 041N0ZP |
| 041K0JH | 041K0ZK | 041L0AM | 041L0KP | 041M0AQ | 041N09Q | 041N0ZQ |
| 041K0JJ | 041K0ZL | 041L0AN | 041L0KQ | 041M0AS | 041N09S | 041N0ZS |

### Laparoscopic Colon Resection

|         |         |         |         |         |         |         |         |
|---------|---------|---------|---------|---------|---------|---------|---------|
| 0DTH4ZZ | 0DTL4ZZ | 0DTN4ZZ | 0DBF4ZZ | 0DBH4ZZ | 0DBL4ZZ | 0DBN4ZZ | 0DTM4ZZ |
| 0DTF4ZZ | 0DTG4ZZ | 0DBE4ZZ | 0DBG4ZZ | 0DBK4ZZ | 0DBM4ZZ | 0DTK4ZZ | 0DTE4ZZ |

### Open Colon Resection

|         |         |         |         |         |         |
|---------|---------|---------|---------|---------|---------|
| 0DBE0ZZ | 0DTK0ZZ | 0DTN0ZZ | 0DBG0ZZ | 0DBL0ZZ | 0DTK0ZZ |
| 0DTH0ZZ | 0DTL0ZZ | 0DBE0ZZ | 0DBH0ZZ | 0DBM0ZZ | 0DTM0ZZ |
| 0DTF0ZZ | 0DTG0ZZ | 0DBF0ZZ | 0DBK0ZZ | 0DBN0ZZ | 0DTE0ZZ |

### Thoracoscopic Pulmonary Lobectomy

0BBC4ZZ  
0BBD4ZZ

OBBF4ZZ  
OBBG4ZZ  
OBBJ4ZZ

### Open Pulmonary Lobectomy

|         |         |         |         |         |         |         |         |
|---------|---------|---------|---------|---------|---------|---------|---------|
| OB5C0ZZ | OB5D7ZZ | OB5G3ZZ | OBBC0ZZ | OBBD7ZZ | OBBG3ZZ | OBTC4ZZ | OBTC0ZZ |
| OB5C3ZZ | OB5F0ZZ | OB5G7ZZ | OBBC3ZZ | OBBF0ZZ | OBBG7ZZ | OBTD4ZZ | OBTD0ZZ |
| OB5C7ZZ | OB5F3ZZ | OB5J0ZZ | OBBC7ZZ | OBBF3ZZ | OBBJ0ZZ | OBTF4ZZ | OBTF0ZZ |
| OB5D0ZZ | OB5F7ZZ | OB5J3ZZ | OBBD0ZZ | OBBF7ZZ | OBBJ3ZZ | OBTG4ZZ | OBTG0ZZ |
| OB5D3ZZ | OB5G0ZZ | OB5J7ZZ | OBBD3ZZ | OBBG0ZZ | OBBJ7ZZ | OBTJ4ZZ | OBTJ0ZZ |

### Total Hip Arthroplasty

|         |         |         |         |         |         |         |         |
|---------|---------|---------|---------|---------|---------|---------|---------|
| OSR9019 | OSR904Z | OSRB02Z | OSRB0KZ | OSRA0J9 | OSRE03A | OSRR03A | OSRS03A |
| OSR901A | OSR907Z | OSRB039 | OSRA009 | OSRA0JA | OSRE03Z | OSRR03Z | OSRS03Z |
| OSR901Z | OSR90J9 | OSRB03A | OSRA00A | OSRA0JZ | OSRE07Z | OSRR07Z | OSRS07Z |
| OSR9029 | OSR90JA | OSRB03Z | OSRA00Z | OSRA0KZ | OSRE0J9 | OSRR0J9 | OSRS0J9 |
| OSR902A | OSR90JZ | OSRB049 | OSRA019 | OSRE009 | OSRE0JA | OSRR0JA | OSRS0JA |
| OSR902Z | OSR90KZ | OSRB04A | OSRA01A | OSRE00A | OSRE0JZ | OSRR0JZ | OSRS0JZ |
| OSR9039 | OSRB019 | OSRB04Z | OSRA01Z | OSRE00Z | OSRE0KZ | OSRR0KZ | OSRS0KZ |
| OSR903A | OSRB01A | OSRB07Z | OSRA039 | OSRE019 | OSRR019 | OSRS019 |         |
| OSR903Z | OSRB01Z | OSRB0J9 | OSRA03A | OSRE01A | OSRR01A | OSRS01A |         |
| OSR9049 | OSRB029 | OSRB0JA | OSRA03Z | OSRE01Z | OSRR01Z | OSRS01Z |         |
| OSR904A | OSRB02A | OSRB0JZ | OSRA07Z | OSRE039 | OSRR039 | OSRS039 |         |

### Total Knee Arthroplasty

|         |         |         |
|---------|---------|---------|
| OSRC07Z | OSRD0LZ | OSRV0KZ |
| OSRC0J9 | OSRT07Z | OSRW07Z |
| OSRC0JA | OSRT0J9 | OSRW0J9 |
| OSRC0JZ | OSRT0JA | OSRW0JA |
| OSRC0KZ | OSRT0JZ | OSRW0JZ |
| OSRC0L9 | OSRT0KZ | OSRW0KZ |
| OSRC0LA | OSRU07Z |         |
| OSRC0LZ | OSRU0J9 |         |
| OSRD07Z | OSRU0JA |         |
| OSRD0J9 | OSRU0JZ |         |
| OSRD0JA | OSRU0KZ |         |
| OSRD0JZ | OSRV07Z |         |
| OSRD0KZ | OSRV0J9 |         |
| OSRD0L9 | OSRV0JA |         |
| OSRD0LA | OSRV0JZ |         |

| <b>eTable 2. Top 15 Diagnosis Codes for 90-Day Readmissions</b>                                                                                                   |                                               |
|-------------------------------------------------------------------------------------------------------------------------------------------------------------------|-----------------------------------------------|
| <b>Primary Diagnosis for Readmission</b>                                                                                                                          | <b>Readmissions<br/>(n=164,755),<br/>n(%)</b> |
| Infection following a procedure, initial encounter                                                                                                                | 7097 (6.6)                                    |
| Sepsis, unspecified organism                                                                                                                                      | 6420 (6.0)                                    |
| <b>Acute Kidney Failure, unspecified</b>                                                                                                                          | 3224 (3.0)                                    |
| <b>Hypertensive Heart Disease with Heart Failure</b>                                                                                                              | 2437 (2.3)                                    |
| <b>Hypertensive heart and chronic kidney disease with heart failure and stage 1 through stage 4 chronic kidney disease, or unspecified chronic kidney disease</b> | 2099 (2.0)                                    |
| Other pulmonary embolism without acute cor pulmonale                                                                                                              | 2032 (1.9)                                    |
| Encounter for attention to ileostomy                                                                                                                              | 1961 (1.8)                                    |
| <b>Pneumonia, unspecified organism</b>                                                                                                                            | 1572 (1.5)                                    |
| <b>Urinary tract infection, site not specified</b>                                                                                                                | 1309 (1.2)                                    |
| Disruption of external operation (surgical) wound, not elsewhere classified, initial encounter                                                                    | 1292 (1.2)                                    |
| Non-ST elevation (NSTEMI) myocardial infarction                                                                                                                   | 1204 (1.1)                                    |
| Pleural effusion, not elsewhere classified                                                                                                                        | 1110 (1.0)                                    |
| Paroxysmal atrial fibrillation                                                                                                                                    | 939 (0.9)                                     |
| Unspecified intestinal obstruction                                                                                                                                | 899 (0.8)                                     |
| Gastrointestinal hemorrhage, unspecified                                                                                                                          | 894 (0.8)                                     |
| *Bolded entries represent codes defined as Ambulatory Care Sensitive Conditions (ACSCs)                                                                           |                                               |

**eTable 3.** 90-Day Readmissions

| Diagnosis                                   | 90 Day Readmissions |       |       |           |           |            |                |                |      |      |
|---------------------------------------------|---------------------|-------|-------|-----------|-----------|------------|----------------|----------------|------|------|
|                                             | All Surgery         | CABG  | AAA   | LE Bypass | Lap Colon | Open Colon | VATS Lobectomy | Open Lobectomy | THA  | TKA  |
| Any Diagnosis                               | 8.5%                | 15.0% | 16.6% | 24.6%     | 11.6%     | 17.8%      | 10.0%          | 13.1%          | 6.7% | 4.3% |
| All Potentially Preventable Reasons         | 1.5%                | 4.1%  | 2.9%  | 5.3%      | 1.3%      | 2.5%       | 1.7%           | 2.4%           | 1.3% | 0.5% |
| Short Term Diabetes Complications           | 0%                  | 0%    | 0%    | 0%        | 0%        | 0%         | 0%             | 0%             | 0%   | 0%   |
| Long Term Diabetes Complications            | 0.1%                | 0.2%  | 0.2%  | 2.6%      | 0%        | 0.1%       | 0%             | 0%             | 0%   | 0%   |
| Chronic Obstructive Pulmonary Disease       | 0.2%                | 0.3%  | 0.5%  | 0.4%      | 0.1%      | 0.2%       | 0.6%           | 0.7%           | 0.2% | 0.1% |
| Hypertension                                | 0%                  | 0.1%  | 0.1%  | 0.1%      | 0%        | 0%         | 0%             | 0.1%           | 0%   | 0%   |
| Hypertension-Related Chronic Kidney Disease | 0%                  | 0%    | 0%    | 0%        | 0%        | 0%         | 0%             | 0%             | 0%   | 0%   |
| Congestive Heart Failure                    | 0.5%                | 2.6%  | 0.8%  | 1.4%      | 0.2%      | 0.4%       | 0.3%           | 0.4%           | 0.4% | 0.1% |
| Community Acquired Pneumonia                | 0.2%                | 0.4%  | 0.2%  | 0.3%      | 0.1%      | 0.2%       | 0.5%           | 0.7%           | 0.2% | 0.1% |
| Sickle Cell Disease                         | 0%                  | 0%    | 0%    | 0%        | 0%        | 0%         | 0%             | 0%             | 0%   | 0%   |
| Urinary Tract Infection                     | 0.2%                | 0.2%  | 0.3%  | 0.2%      | 0.2%      | 0.4%       | 0.1%           | 0.2%           | 0.2% | 0.1% |
| Uncontrolled Diabetes                       | 0%                  | 0.1%  | 0.1%  | 0.1%      | 0%        | 0.1%       | 0%             | 0%             | 0%   | 0%   |
| Failure to Thrive                           | 0%                  | 0%    | 0%    | 0%        | 0%        | 0%         | 0%             | 0%             | 0%   | 0%   |
| Dental Conditions                           | 0%                  | 0%    | 0%    | 0%        | 0%        | 0%         | 0%             | 0%             | 0%   | 0%   |
| Vaccine Preventable Diseases                | 0%                  | 0%    | 0%    | 0%        | 0%        | 0%         | 0%             | 0%             | 0%   | 0%   |
| Nutritional Deficiencies                    | 0%                  | 0%    | 0.1%  | 0%        | 0%        | 0%         | 0%             | 0%             | 0%   | 0%   |
| Convulsions                                 | 0%                  | 0%    | 0%    | 0%        | 0%        | 0%         | 0%             | 0%             | 0%   | 0%   |

|                                         |      |      |      |      |      |      |      |      |      |      |
|-----------------------------------------|------|------|------|------|------|------|------|------|------|------|
| Dehydration                             | 0%   | 0%   | 0%   | 0%   | 0%   | 0%   | 0%   | 0%   | 0%   | 0%   |
| Hypoglycemia                            | 0%   | 0%   | 0%   | 0%   | 0%   | 0%   | 0%   | 0%   | 0%   | 0%   |
| Pelvic Inflammatory Disease             | 0%   | 0%   | 0%   | 0%   | 0%   | 0%   | 0%   | 0%   | 0%   | 0%   |
| Ear-Nose-Throat Infections              | 0%   | 0%   | 0%   | 0%   | 0%   | 0%   | 0%   | 0%   | 0%   | 0%   |
| Angina                                  | 0%   | 0%   | 0%   | 0%   | 0%   | 0%   | 0%   | 0%   | 0%   | 0%   |
| Grand Mal Seizures                      | 0%   | 0%   | 0%   | 0%   | 0%   | 0%   | 0%   | 0%   | 0%   | 0%   |
| Superficial Surgical Site Infection     | 0%   | 0%   | 0.1% | 0%   | 0%   | 0%   | 0%   | 0%   | 0%   | 0%   |
| Acute Kidney Injury/Acute Renal Failure | 0.3% | 0.5% | 0.7% | 0.6% | 0.6% | 1.2% | 0.1% | 0.3% | 0.2% | 0.1% |
| Aspiration Pneumonitis                  | 0.1% | 0.1% | 0.1% | 0.1% | 0%   | 0.1% | 0.1% | 0.1% | 0.1% | 0%   |

**eTable 4.** Sensitivity Analysis—Multivariable Model—ACSC Only

| Characteristic                                              | aOR  | 95% CI    | P value |
|-------------------------------------------------------------|------|-----------|---------|
| <b>Age, per additional decade</b>                           | 1.19 | 1.17-1.22 | <0.001  |
| <b>Female</b>                                               | 1.14 | 1.09-1.19 | <0.001  |
| <b>Surgical Procedure</b>                                   |      |           |         |
| Coronary Artery Bypass Grafting                             | REF  | REF       |         |
| Open Abdominal Aortic Aneurysm Repair                       | 1.05 | 0.83-1.31 | 0.697   |
| Lower Extremity Bypass                                      | 1.66 | 1.49-1.86 | <0.001  |
| Laparoscopic Colon Resection                                | 0.53 | 0.47-0.61 | <0.001  |
| Open Colon Resection                                        | 0.49 | 0.45-0.55 | <0.001  |
| Video Assisted Thoracoscopic Pulmonary Lobectomy            | 1.03 | 0.87-1.22 | 0.745   |
| Open Pulmonary Lobectomy                                    | 1.63 | 1.41-1.87 | <0.001  |
| Total Hip Arthroplasty                                      | 0.46 | 0.42-0.50 | <0.001  |
| Total Knee Arthroplasty                                     | 0.48 | 0.43-0.53 | <0.001  |
| <b>Insurance Status</b>                                     |      |           |         |
| For age <65 years                                           |      |           |         |
| Private Insurance                                           | REF  | REF       |         |
| Medicare/Medicaid                                           | 2.21 | 2.03-2.42 | <0.001  |
| Uninsured                                                   | 1.17 | 0.92-1.48 | 0.197   |
| Other                                                       | 1.28 | 1.04-1.57 | 0.017   |
| For age ≥ 65 years                                          |      |           |         |
| Private Insurance                                           | REF  | REF       |         |
| Medicare/Medicaid                                           | 1.20 | 1.07-1.34 | 0.001   |
| Uninsured                                                   | 0.68 | 0.40-1.13 | 0.135   |
| Other                                                       | 0.83 | 0.65-1.06 | 0.129   |
| <b>Hospital Metropolitan-Teaching Status</b>                |      |           |         |
| Metropolitan Non-teaching                                   | REF  | REF       |         |
| Metropolitan Teaching                                       | 0.89 | 0.82-0.96 | 0.003   |
| Non-metropolitan                                            | 1.09 | 0.97-1.23 | 0.149   |
| <b>Hospital Size</b>                                        |      |           |         |
| Small                                                       | REF  | REF       |         |
| Medium                                                      | 0.95 | 0.85-1.05 | 0.288   |
| Large                                                       | 0.88 | 0.80-0.97 | 0.007   |
| <b>Median Household Income Quartile of Patient Zip Code</b> |      |           |         |
| <25%                                                        | REF  | REF       |         |
| 25-50%                                                      | 0.95 | 0.89-1.00 | 0.061   |
| 50-75%                                                      | 0.92 | 0.86-0.98 | 0.021   |
| >75%                                                        | 0.83 | 0.77-0.90 | <0.001  |
| <b>Emergent Surgery</b>                                     | 7.81 | 7.18-8.48 | <0.001  |
| <b>Comorbidities</b>                                        |      |           |         |



|                                       |      |           |        |
|---------------------------------------|------|-----------|--------|
| Acute Myocardial Infarction           | 0.59 | 0.55-0.64 | <0.001 |
| Congestive Heart Failure              | 3.68 | 3.49-3.88 | <0.001 |
| Peripheral Vascular Disease           | 0.94 | 0.88-1.00 | 0.039  |
| Cerebrovascular Disease               | 0.84 | 0.77-0.91 | <0.001 |
| Dementia                              | 1.09 | 1.00-1.19 | 0.045  |
| Chronic Obstructive Pulmonary Disease | 1.62 | 1.45-1.70 | <0.001 |
| Rheumatoid Disease                    | 1.22 | 1.10-1.36 | <0.001 |
| Peptic Ulcer Disease                  | 0.91 | 0.74-1.12 | 0.356  |
| Mild Liver Disease                    | 0.97 | 0.85-1.12 | 0.693  |
| Diabetes                              | 1.49 | 1.41-1.58 | <0.001 |
| Diabetes with Complications           | 1.88 | 1.77-2.00 | <0.001 |
| Hemiplegia or Paraplegia              | 0.94 | 0.72-1.23 | 0.654  |
| Chronic Kidney Disease                | 1.51 | 1.43-1.60 | <0.001 |
| Cancer                                | 1.04 | 0.94-1.14 | 0.484  |
| Moderate to Severe Liver Disease      | 0.91 | 0.67-1.22 | 0.508  |
| Metastatic Cancer                     | 1.06 | 0.93-1.22 | 0.394  |
| Acquired Immunodeficiency Syndrome    | 2.10 | 1.34-3.28 | 0.001  |

\*Effect of primary payer stratified by age < or ≥ 65 years was estimated with a single model including an interaction term between the covariate for primary payer and a categorical variable for age ≥ 65 years. Abbreviations: aOR, adjusted odds ratio; CI, confidence interval; ACSC, Ambulatory Care Sensitive Condition

**eTable 5.** Sensitivity Analysis—Multivariable Model—LOS ≤ 2 Days

| Characteristic                                              | aOR  | 95% CI     | P value |
|-------------------------------------------------------------|------|------------|---------|
| <b>Age, per additional decade</b>                           | 1.00 | 1.00-1.00  | 0.214   |
| <b>Female</b>                                               | 0.91 | 0.89-0.93  | <0.001  |
| <b>Surgical Procedure</b>                                   |      |            |         |
| Coronary Artery Bypass Grafting                             | REF  | REF        |         |
| Open Abdominal Aortic Aneurysm Repair                       | 1.25 | 1.10-1.43  | 0.001   |
| Lower Extremity Bypass                                      | 1.78 | 1.65-1.93  | <0.001  |
| Laparoscopic Colon Resection                                | 1.58 | 1.46-1.72  | <0.001  |
| Open Colon Resection                                        | 1.14 | 1.06-1.23  | <0.001  |
| Video Assisted Thoracoscopic Pulmonary Lobectomy            | 1.00 | 0.89-1.12  | 0.961   |
| Open Pulmonary Lobectomy                                    | 1.82 | 1.66-1.99  | <0.001  |
| Total Hip Arthroplasty                                      | 0.80 | 0.75-0.85  | <0.001  |
| Total Knee Arthroplasty                                     | 1.35 | 1.23-1.47  | <0.001  |
| <b>Insurance Status</b>                                     |      |            |         |
| For age <65 years                                           |      |            |         |
| Private Insurance                                           | REF  | REF        |         |
| Medicare/Medicaid                                           | 1.44 | 1.38-1.50  | <0.001  |
| Uninsured                                                   | 0.75 | 0.67-0.83  | <0.001  |
| Other                                                       | 0.93 | 0.85-1.02  | 0.105   |
| For age ≥ 65 years                                          |      |            |         |
| Private Insurance                                           | REF  | REF        |         |
| Medicare/Medicaid                                           | 1.09 | 1.02-1.15  | 0.007   |
| Uninsured                                                   | 0.65 | 0.47-0.90  | 0.009   |
| Other                                                       | 0.91 | 0.80-1.03  | 0.144   |
| <b>Hospital Metropolitan-Teaching Status</b>                |      |            |         |
| Metropolitan Non-teaching                                   | REF  | REF        |         |
| Metropolitan Teaching                                       | 1.04 | 0.97-1.11  | 0.282   |
| Non-metropolitan                                            | 0.94 | 0.85-1.04  | 0.231   |
| <b>Hospital Size</b>                                        |      |            |         |
| Small                                                       | REF  | REF        |         |
| Medium                                                      | 0.97 | 0.88-1.08  | 0.611   |
| Large                                                       | 0.99 | 0.91-1.09  | 0.900   |
| <b>Median Household Income Quartile of Patient Zip Code</b> |      |            |         |
| <25%                                                        | REF  | REF        |         |
| 25-50%                                                      | 1.03 | 0.99-1.07  | 0.178   |
| 50-75%                                                      | 1.06 | 1.01-1.11  | 0.009   |
| >75%                                                        | 1.02 | 0.97-1.08  | 0.467   |
| <b>Emergent Surgery</b>                                     | 9.93 | 9.20-10.71 | <0.001  |
| <b>Comorbidities</b>                                        |      |            |         |

|                                       |      |           |        |
|---------------------------------------|------|-----------|--------|
| Acute Myocardial Infarction           | 0.75 | 0.72-0.78 | <0.001 |
| Congestive Heart Failure              | 1.27 | 1.23-1.32 | <0.001 |
| Peripheral Vascular Disease           | 1.03 | 0.99-1.07 | 0.105  |
| Cerebrovascular Disease               | 1.37 | 1.30-1.43 | <0.001 |
| Dementia                              | 0.78 | 0.73-0.83 | <0.001 |
| Chronic Obstructive Pulmonary Disease | 1.18 | 1.14-1.21 | <0.001 |
| Rheumatoid Disease                    | 1.16 | 1.10-1.23 | <0.001 |
| Peptic Ulcer Disease                  | 1.48 | 1.34-1.63 | <0.001 |
| Mild Liver Disease                    | 1.07 | 1.00-1.14 | 0.065  |
| Diabetes                              | 1.18 | 1.15-1.21 | <0.001 |
| Diabetes with Complications           | 1.17 | 1.12-1.22 | <0.001 |
| Hemiplegia or Paraplegia              | 0.95 | 0.85-1.07 | 0.396  |
| Chronic Kidney Disease                | 1.24 | 1.20-1.29 | <0.001 |
| Cancer                                | 1.20 | 1.14-1.26 | <0.001 |
| Moderate to Severe Liver Disease      | 1.56 | 1.33-1.82 | <0.001 |
| Metastatic Cancer                     | 1.53 | 1.43-1.64 | <0.001 |
| Acquired Immunodeficiency Syndrome    | 1.22 | 0.98-1.52 | 0.077  |

\*Effect of primary payer stratified by age < or ≥ 65 years was estimated with a single model including an interaction term between the covariate for primary payer and a categorical variable for age ≥ 65 years  
Abbreviations: aOR, adjusted odds ratio; CI, confidence interval; LOS, length of stay
